# Supplementary material for: Motility of glioblastoma cells is driven by netrin-1 induced gain of stemness
Source: Springer Nature journal article supplement (doi:10.1186/s13046-016-0482-0), 2017-01-09

Figure S1

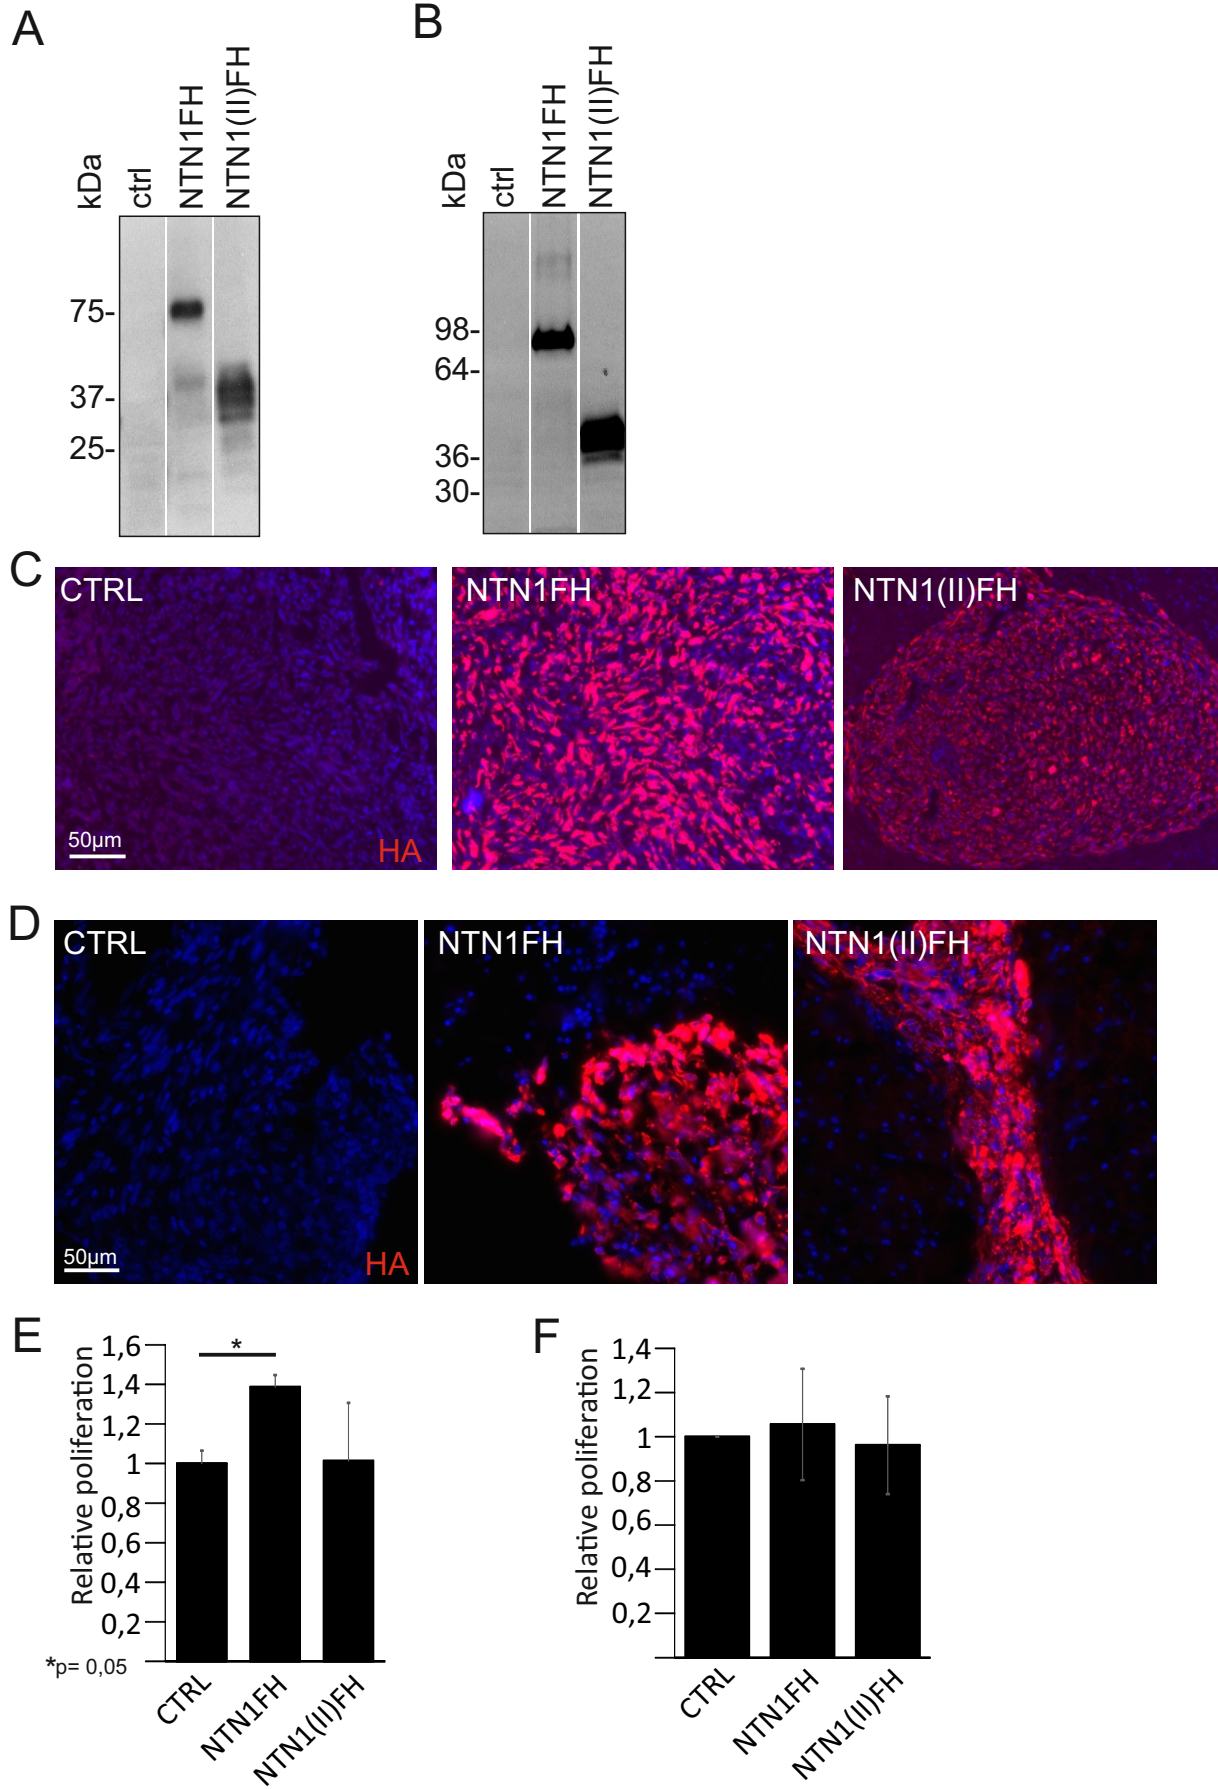

Supplement: MOESM1 [file 11987144]
